# Supplementary material for: New Lung Cancer Panel for High-Throughput Targeted Resequencing
Source: PubMed Central journal article supplement — Genomics Inform. 2014 Jun 30;12(2):50–7. doi: 10.5808/GI.2014.12.2.50 (PMC4099348; doi:10.5808/gi.2014.12.2.50), 2014-06-30
Supplement: gni-12-50-s001.pdf [file gni-12-50-s001.pdf]

**Supplementary Table 1.** Single nucleotide variations (SNVs) comparison between normal and cancer samples

| Chr   | Coord     | Gene         | Coord Ptn. | WT | MT | H-1650 | H-23 | NA17022 | Polyphen <sup>a</sup> | rsID       |
|-------|-----------|--------------|------------|----|----|--------|------|---------|-----------------------|------------|
| chr1  | 156811967 | <i>NTRK1</i> | 35         | T  | I  | MT     | MT   | WT      | Not predictable       | .          |
| chr1  | 156843628 | <i>NTRK1</i> | 352        | T  | P  | MT     | MT   | WT      | Probably_damaging     | .          |
| chr11 | 108121733 | <i>ATM</i>   | 514        | G  | D  | WT     | MT   | WT      | Possibly_damaging     | rs2235000  |
| chr11 | 108122725 | <i>ATM</i>   | 590        | E  | G  | MT     | MT   | WT      | Probably_damaging     | .          |
| chr11 | 108124600 | <i>ATM</i>   | 653        | L  | H  | WT     | MT   | WT      | Probably_damaging     | .          |
| chr11 | 108159732 | <i>ATM</i>   | 1380       | H  | Y  | WT     | MT   | WT      | Benign                | rs3092856  |
| chr11 | 108183167 | <i>ATM</i>   | 1983       | N  | S  | MT     | MT   | MT      | Benign                | rs659243   |
| chr11 | 108206672 | <i>ATM</i>   | 2751       | T  | I  | WT     | MT   | WT      | Benign                | .          |
| chr12 | 25398285  | <i>KRAS</i>  | 12         | G  | C  | WT     | MT   | WT      | Benign                | .          |
| chr13 | 48954304  | <i>RB1</i>   | 475        | K  | N  | MT     | WT   | WT      | Benign                | .          |
| chr15 | 41796341  | <i>LTK</i>   | 686        | R  | S  | MT     | MT   | WT      | Benign                | .          |
| chr15 | 41800377  | <i>LTK</i>   | 319        | N  | T  | MT     | WT   | MT      | Probably_damaging     | .          |
| chr15 | 41800381  | <i>LTK</i>   | 318        | L  | V  | MT     | WT   | WT      | Benign                | .          |
| chr15 | 88483887  | <i>NTRK3</i> | 561        | S  | R  | MT     | MT   | WT      | Benign                | .          |
| chr15 | 88576108  | <i>NTRK3</i> | 522        | N  | T  | MT     | MT   | WT      | Benign                | .          |
| chr15 | 88576249  | <i>NTRK3</i> | 475        | E  | G  | MT     | WT   | WT      | Possibly_damaging     | .          |
| chr15 | 88576264  | <i>NTRK3</i> | 470        | V  | G  | MT     | MT   | WT      | Possibly_damaging     | .          |
| chr15 | 88678596  | <i>NTRK3</i> | 314        | E  | *  | WT     | MT   | WT      | Not predictable       | .          |
| chr15 | 88680709  | <i>NTRK3</i> | 183        | N  | T  | MT     | MT   | WT      | Benign                | .          |
| chr17 | 29509678  | <i>NF1</i>   | 295        | N  | H  | WT     | WT   | MT      | Benign                | .          |
| chr17 | 29509680  | <i>NF1</i>   | 295        | N  | K  | WT     | WT   | MT      | Benign                | .          |
| chr17 | 29528439  | <i>NF1</i>   | 399        | A  | V  | MT     | MT   | WT      | Benign                | .          |
| chr17 | 29556404  | <i>NF1</i>   | 924        | E  | A  | MT     | MT   | WT      | Probably_damaging     | .          |
| chr17 | 29559197  | <i>NF1</i>   | 1102       | L  | I  | MT     | MT   | MT      | Probably_damaging     | .          |
| chr17 | 29559198  | <i>NF1</i>   | 1102       | L  | *  | MT     | MT   | WT      | Probably_damaging     | .          |
| chr17 | 29559877  | <i>NF1</i>   | 1158       | D  | E  | MT     | WT   | WT      | Possibly_damaging     | .          |
| chr17 | 29562743  | <i>NF1</i>   | 1275       | F  | L  | MT     | MT   | WT      | Possibly_damaging     | .          |
| chr17 | 29622242  | <i>OMG</i>   | 372        | S  | T  | WT     | WT   | MT      | Not predictable       | .          |
| chr17 | 29622380  | <i>OMG</i>   | 326        | F  | L  | WT     | WT   | MT      | Not predictable       | .          |
| chr17 | 29622953  | <i>OMG</i>   | 135        | N  | D  | WT     | MT   | WT      | Not predictable       | .          |
| chr17 | 29622956  | <i>OMG</i>   | 134        | K  | E  | WT     | MT   | WT      | Not predictable       | .          |
| chr17 | 29623288  | <i>OMG</i>   | 23         | G  | D  | MT     | WT   | MT      | Not predictable       | rs11080149 |
| chr17 | 29623318  | <i>OMG</i>   | 13         | C  | Y  | MT     | WT   | WT      | Not predictable       | .          |
| chr17 | 29631996  | <i>EVI2B</i> | 218        | L  | H  | MT     | MT   | WT      | Not predictable       | .          |
| chr17 | 29632151  | <i>EVI2B</i> | 166        | K  | N  | MT     | MT   | WT      | Not predictable       | .          |
| chr17 | 29632153  | <i>EVI2B</i> | 166        | K  | Q  | MT     | MT   | WT      | Not predictable       | .          |
| chr17 | 29663834  | <i>NF1</i>   | 2089       | L  | *  | MT     | MT   | WT      | Not predictable       | .          |
| chr17 | 29687691  | <i>NF1</i>   | 2762       | T  | A  | WT     | WT   | MT      | Not predictable       | .          |
| chr17 | 37872035  | <i>ERBB2</i> | 452        | W  | C  | WT     | MT   | WT      | Probably_damaging     | rs4252633  |
| chr17 | 37879588  | <i>ERBB2</i> | 655        | I  | V  | MT     | WT   | MT      | Benign                | rs1136201  |
| chr17 | 37881420  | <i>ERBB2</i> | 871        | D  | G  | WT     | MT   | WT      | Probably_damaging     | .          |
| chr17 | 37881581  | <i>ERBB2</i> | 884        | V  | G  | MT     | WT   | MT      | Probably_damaging     | .          |
| chr17 | 37883992  | <i>ERBB2</i> | 1155       | G  | S  | MT     | MT   | MT      | Benign                | .          |
| chr17 | 37884037  | <i>ERBB2</i> | 1170       | P  | A  | MT     | MT   | MT      | Probably_damaging     | rs61552325 |
| chr17 | 7572977   | <i>TP53</i>  | 378        | S  | P  | WT     | MT   | WT      | Probably_damaging     | rs80184930 |
| chr17 | 7572980   | <i>TP53</i>  | 377        | T  | P  | MT     | MT   | WT      | Benign                | .          |
| chr17 | 7577543   | <i>TP53</i>  | 246        | M  | I  | WT     | MT   | WT      | Not predictable       | .          |

| Chr   | Coord     | Gene   | Coord Ptn. | WT | MT | H-1650 | H-23 | NA17022 | Polyphen <sup>a</sup> | rsID       |
|-------|-----------|--------|------------|----|----|--------|------|---------|-----------------------|------------|
| chr17 | 7578397   | TP53   | 178        | H  | P  | WT     | MT   | WT      | Not predictable       | .          |
| chr17 | 7579335   | TP53   | 118        | T  | P  | MT     | MT   | WT      | Probably_damaging     | .          |
| chr17 | 7579416   | TP53   | 91         | W  | R  | MT     | WT   | WT      | Not predictable       | .          |
| chr17 | 7579419   | TP53   | 90         | S  | P  | MT     | WT   | WT      | Benign                | .          |
| chr17 | 7579472   | TP53   | 72         | P  | R  | MT     | WT   | MT      | Not predictable       | rs1042522  |
| chr19 | 1206953   | STK11  | 14         | E  | G  | MT     | WT   | WT      | Benign                | .          |
| chr19 | 1206971   | STK11  | 20         | V  | G  | MT     | WT   | WT      | Probably_damaging     | .          |
| chr19 | 1223034   | STK11  | 324        | P  | R  | MT     | MT   | MT      | Probably_damaging     | .          |
| chr19 | 1223036   | STK11  | 325        | S  | C  | MT     | MT   | MT      | Benign                | .          |
| chr19 | 1223059   | STK11  | 332        | W  | *  | WT     | MT   | WT      | Not predictable       | .          |
| chr2  | 141083420 | LRP1B  | 4084       | R  | L  | WT     | MT   | WT      | Probably_damaging     | .          |
| chr2  | 141143510 | LRP1B  | 3495       | C  | G  | MT     | MT   | WT      | Probably_damaging     | .          |
| chr2  | 141200183 | LRP1B  | 3435       | S  | N  | MT     | MT   | WT      | Possibly_damaging     | .          |
| chr2  | 141232726 | LRP1B  | 3202       | D  | E  | WT     | WT   | MT      | Probably_damaging     | .          |
| chr2  | 141528489 | LRP1B  | 1863       | V  | L  | MT     | MT   | WT      | Benign                | .          |
| chr2  | 141625213 | LRP1B  | 1509       | T  | P  | WT     | MT   | WT      | Probably_damaging     | .          |
| chr2  | 142888232 | LRP1B  | 23         | V  | L  | MT     | MT   | WT      | Benign                | .          |
| chr2  | 142888296 | LRP1B  | 1          | M  | I  | MT     | MT   | WT      | Benign                | .          |
| chr2  | 212251815 | ERBB4  | 1066       | R  | G  | MT     | MT   | WT      | Not predictable       | .          |
| chr2  | 212543863 | ERBB4  | 512        | C  | W  | MT     | MT   | WT      | Probably_damaging     | .          |
| chr2  | 213403178 | ERBB4  | 26         | Q  | P  | WT     | MT   | WT      | Benign                | .          |
| chr2  | 29416173  | ALK    | 1594       | E  | K  | WT     | MT   | WT      | Probably_damaging     | .          |
| chr2  | 29416266  | ALK    | 1563       | T  | P  | WT     | MT   | WT      | Benign                | .          |
| chr2  | 29416366  | ALK    | 1529       | D  | E  | MT     | WT   | MT      | Benign                | rs1881421  |
| chr2  | 29416481  | ALK    | 1491       | K  | R  | WT     | WT   | MT      | Benign                | rs1881420  |
| chr2  | 29416572  | ALK    | 1461       | I  | V  | MT     | MT   | MT      | Benign                | rs1670283  |
| chr2  | 29416614  | ALK    | 1447       | T  | P  | MT     | MT   | WT      | Benign                | .          |
| chr2  | 29416617  | ALK    | 1446       | T  | P  | MT     | MT   | WT      | Benign                | .          |
| chr2  | 29443606  | ALK    | 1204       | L  | P  | MT     | MT   | WT      | Probably_damaging     | .          |
| chr2  | 29448410  | ALK    | 1030       | H  | P  | MT     | WT   | WT      | Benign                | .          |
| chr2  | 29448423  | ALK    | 1026       | T  | P  | MT     | WT   | WT      | Benign                | .          |
| chr2  | 29449862  | ALK    | 998        | D  | A  | WT     | WT   | MT      | Benign                | .          |
| chr2  | 29519785  | ALK    | 596        | M  | V  | WT     | WT   | MT      | Benign                | .          |
| chr2  | 30143026  | ALK    | 167        | Q  | P  | MT     | MT   | WT      | Possibly_damaging     | .          |
| chr2  | 30143038  | ALK    | 163        | V  | G  | MT     | MT   | WT      | Benign                | .          |
| chr2  | 30143047  | ALK    | 160        | E  | G  | WT     | MT   | WT      | Benign                | .          |
| chr2  | 30143086  | ALK    | 147        | E  | G  | WT     | MT   | WT      | Probably_damaging     | .          |
| chr2  | 30143149  | ALK    | 126        | V  | G  | MT     | MT   | WT      | Benign                | .          |
| chr2  | 30143195  | ALK    | 111        | T  | P  | MT     | MT   | WT      | Benign                | .          |
| chr2  | 42510018  | EML4   | 283        | K  | E  | MT     | MT   | MT      | Benign                | rs6736913  |
| chr2  | 42515388  | EML4   | 382        | I  | V  | MT     | MT   | MT      | Benign                | rs10202624 |
| chr2  | 42515437  | EML4   | 398        | K  | R  | WT     | MT   | WT      | Benign                | rs28651764 |
| chr2  | 42528467  | EML4   | 526        | G  | R  | MT     | WT   | WT      | Probably_damaging     | .          |
| chr20 | 57415820  | GNAS   | 220        | K  | T  | MT     | MT   | WT      | Probably_damaging     | .          |
| chr20 | 57415834  | GNAS   | 225        | T  | P  | MT     | MT   | WT      | Probably_damaging     | .          |
| chr20 | 57484811  | GNAS   | 250        | N  | T  | WT     | MT   | WT      | Not predictable       | .          |
| chr20 | 57485747  | GNAS   | 336        | T  | P  | WT     | MT   | WT      | Not predictable       | .          |
| chr20 | 57485832  | GNAS   | 364        | D  | A  | MT     | MT   | WT      | Not predictable       | .          |
| chr3  | 178921406 | PIK3CA | 296        | Q  | H  | MT     | WT   | WT      | Possibly_damaging     | rs74639903 |
| chr3  | 178927410 | PIK3CA | 391        | I  | M  | WT     | WT   | MT      | Benign                | rs3729680  |
| chr3  | 178928019 | PIK3CA | 433        | T  | P  | MT     | WT   | WT      | Benign                | .          |
| chr3  | 178947091 | PIK3CA | 843        | D  | Y  | MT     | WT   | WT      | Benign                | .          |

| Chr  | Coord     | Gene    | Coord Ptn. | WT | MT | H-1650 | H-23 | NA17022 | Polyphen <sup>a</sup> | rsID       |
|------|-----------|---------|------------|----|----|--------|------|---------|-----------------------|------------|
| chr3 | 178947182 | PIK3CA  | 873        | N  | T  | MT     | MT   | WT      | Probably_damaging     | rs74427133 |
| chr3 | 50256237  | SLC38A3 | 388        | V  | G  | WT     | MT   | WT      | Probably_damaging     | .          |
| chr3 | 50379092  | ZMYND10 | 387        | V  | G  | MT     | MT   | WT      | Benign                | .          |
| chr3 | 50381043  | ZMYND10 | 108        | H  | L  | MT     | MT   | WT      | Probably_damaging     | .          |
| chr3 | 89259533  | EPHA3   | 226        | V  | G  | WT     | MT   | WT      | Probably_damaging     | .          |
| chr3 | 89259541  | EPHA3   | 229        | S  | A  | WT     | MT   | WT      | Possibly_damaging     | .          |
| chr3 | 89390213  | EPHA3   | 321        | A  | V  | MT     | MT   | WT      | Benign                | .          |
| chr3 | 89390950  | EPHA3   | 339        | T  | S  | MT     | MT   | WT      | Probably_damaging     | .          |
| chr3 | 89390953  | EPHA3   | 340        | S  | *  | MT     | MT   | WT      | Not predictable       | .          |
| chr3 | 89448595  | EPHA3   | 520        | N  | T  | WT     | MT   | WT      | Benign                | .          |
| chr3 | 89521693  | EPHA3   | 924        | W  | R  | MT     | WT   | MT      | Benign                | rs35124509 |
| chr3 | 89528605  | EPHA3   | 969        | I  | L  | MT     | MT   | WT      | Benign                | .          |
| chr4 | 55129957  | PDGFRA  | 164        | S  | T  | MT     | MT   | WT      | Benign                | .          |
| chr4 | 55131170  | PDGFRA  | 238        | F  | S  | WT     | MT   | WT      | Benign                | .          |
| chr4 | 55139771  | PDGFRA  | 478        | S  | P  | WT     | MT   | WT      | Benign                | rs35597368 |
| chr4 | 55155189  | PDGFRA  | 930        | V  | M  | MT     | MT   | WT      | Benign                | .          |
| chr4 | 55161432  | PDGFRA  | 1088       | F  | S  | WT     | MT   | WT      | Probably_damaging     | .          |
| chr4 | 55955860  | KDR     | 1101       | L  | S  | WT     | MT   | WT      | Probably_damaging     | .          |
| chr4 | 55968636  | KDR     | 676        | Q  | L  | MT     | MT   | WT      | Probably_damaging     | .          |
| chr4 | 55971058  | KDR     | 580        | N  | T  | MT     | WT   | WT      | Possibly_damaging     | rs66604448 |
| chr4 | 55972974  | KDR     | 472        | Q  | H  | MT     | WT   | MT      | Benign                | rs1870377  |
| chr4 | 55979558  | KDR     | 297        | V  | I  | WT     | WT   | MT      | Probably_damaging     | rs2305948  |
| chr4 | 55981519  | KDR     | 140        | E  | Q  | WT     | MT   | WT      | Probably_damaging     | .          |
| chr4 | 55984917  | KDR     | 71         | E  | G  | MT     | WT   | WT      | Possibly_damaging     | rs78312749 |
| chr4 | 55984919  | KDR     | 70         | S  | R  | MT     | WT   | WT      | Possibly_damaging     | rs80237618 |
| chr4 | 66270134  | EPHA5   | 583        | V  | G  | MT     | WT   | WT      | Probably_damaging     | .          |
| chr4 | 66467407  | EPHA5   | 288        | K  | E  | WT     | WT   | MT      | Possibly_damaging     | .          |
| chr4 | 66467418  | EPHA5   | 284        | V  | G  | WT     | WT   | MT      | Probably_damaging     | .          |
| chr5 | 112173573 | APC     | 761        | E  | A  | WT     | MT   | WT      | Possibly_damaging     | .          |
| chr5 | 112176477 | APC     | 1729       | N  | I  | MT     | MT   | WT      | Probably_damaging     | .          |
| chr5 | 112176698 | APC     | 1803       | R  | *  | MT     | MT   | MT      | Not predictable       | .          |
| chr5 | 112176711 | APC     | 1807       | D  | V  | MT     | MT   | WT      | Possibly_damaging     | .          |
| chr5 | 112176756 | APC     | 1822       | V  | D  | MT     | MT   | MT      | Benign                | rs459552   |
| chr5 | 176516631 | FGFR4   | 10         | V  | I  | WT     | WT   | MT      | Unknown               | rs1966265  |
| chr5 | 176517797 | FGFR4   | 136        | P  | L  | MT     | MT   | MT      | Benign                | rs376618   |
| chr5 | 176519369 | FGFR4   | 259        | T  | P  | MT     | MT   | WT      | Probably_damaging     | .          |
| chr5 | 176519372 | FGFR4   | 260        | T  | P  | MT     | MT   | WT      | Probably_damaging     | .          |
| chr5 | 176519670 | FGFR4   | 314        | E  | D  | MT     | MT   | WT      | Benign                | .          |
| chr5 | 176520356 | FGFR4   | 361        | T  | A  | MT     | MT   | WT      | Benign                | .          |
| chr5 | 176524677 | FGFR4   | 763        | *  | C  | MT     | MT   | WT      | Not predictable       | .          |
| chr7 | 41729469  | INHBA   | 354        | C  | S  | MT     | WT   | WT      | Probably_damaging     | .          |
| chr7 | 41729523  | INHBA   | 336        | N  | D  | MT     | MT   | WT      | Benign                | .          |
| chr7 | 41739781  | INHBA   | 64         | N  | K  | MT     | MT   | WT      | Probably_damaging     | .          |
| chr7 | 55221756  | EGFR    | 267        | L  | P  | MT     | MT   | WT      | Probably_damaging     | .          |
| chr7 | 55223589  | EGFR    | 319        | E  | G  | WT     | MT   | WT      | Probably_damaging     | .          |
| chr7 | 55223601  | EGFR    | 323        | V  | G  | WT     | MT   | WT      | Possibly_damaging     | .          |
| chr7 | 55238109  | EGFR    | 664        | Q  | K  | WT     | MT   | WT      | Not predictable       | .          |
| chr7 | 55249058  | EGFR    | 786        | V  | L  | MT     | WT   | WT      | Probably_damaging     | .          |
| chr7 | 55268927  | EGFR    | 998        | Y  | F  | WT     | MT   | WT      | Probably_damaging     | .          |
| chr9 | 21971147  | CDKN2A  | 85         | Q  | L  | WT     | MT   | WT      | Not predictable       | .          |
| chr9 | 8341827   | PTPRD   | 1198       | I  | F  | WT     | MT   | WT      | Probably_damaging     | .          |
| chr9 | 8485806   | PTPRD   | 1004       | P  | Q  | WT     | MT   | WT      | Probably_damaging     | .          |

| Chr  | Coord     | Gene         | Coord Ptn. | WT | MT | H-1650 | H-23 | NA17022 | Polyphen <sup>a</sup> | rsID       |
|------|-----------|--------------|------------|----|----|--------|------|---------|-----------------------|------------|
| chr9 | 8485834   | <i>PTPRD</i> | 995        | R  | C  | MT     | WT   | WT      | Benign                | rs35929428 |
| chr9 | 8499801   | <i>PTPRD</i> | 723        | V  | G  | MT     | WT   | WT      | Possibly_damaging     | .          |
| chr9 | 8518097   | <i>PTPRD</i> | 422        | T  | P  | MT     | MT   | WT      | Possibly_damaging     | .          |
| chrX | 110391103 | <i>PAK3</i>  | 160        | S  | G  | MT     | MT   | WT      | Not predictable       | .          |
| chrX | 110406158 | <i>PAK3</i>  | 183        | S  | A  | MT     | WT   | WT      | Not predictable       | .          |

Chr, chromosome; WT, wild type; MT, mutant type.

Coord, Coord Ptn, and rsID represent for chromosome position and its corresponding amino acid position of the protein, and SNP identification number in the dbSNP database, respectively.

<sup>a</sup>PolyPhen (Polymorphism Phenotyping) was utilized for prediction of possible protein damage by an amino acid change.
