# Supplementary material for: New Lung Cancer Panel for High-Throughput Targeted Resequencing
Source: PubMed Central journal article supplement — Genomics Inform. 2014 Jun 30;12(2):50–7. doi: 10.5808/GI.2014.12.2.50 (PMC4099348; doi:10.5808/gi.2014.12.2.50), 2014-06-30
Supplement: gni-12-50-s002.pdf [file gni-12-50-s002.pdf]

**Supplementary Table 2.** Short insertions and deletions (INDELs) comparison between normal and cancer samples

| Chr   | Coord     | Gene         | Exon | INDEL (reference/variation) | H-1650 | H-23 | NA17022 |
|-------|-----------|--------------|------|-----------------------------|--------|------|---------|
| chr1  | 156841410 | <i>NTRK1</i> | 9    | */+C                        | MT     | MT   | MT      |
| chr1  | 156846205 | <i>NTRK1</i> | 16   | */-G                        | WT     | WT   | MT      |
| chr1  | 156846206 | <i>NTRK1</i> | 16   | */+C                        | WT     | MT   | WT      |
| chr1  | 156849070 | <i>NTRK1</i> | 17   | -A/*                        | MT     | MT   | MT      |
| chr11 | 108115511 | <i>ATM</i>   | 6    | */+TT                       | MT     | MT   | WT      |
| chr11 | 108117739 | <i>ATM</i>   | 7    | */+TTG                      | WT     | MT   | WT      |
| chr11 | 108121478 | <i>ATM</i>   | 9    | */+GT                       | MT     | WT   | WT      |
| chr11 | 108121632 | <i>ATM</i>   | 9    | */+G                        | MT     | MT   | MT      |
| chr11 | 108124737 | <i>ATM</i>   | 12   | */-A                        | MT     | MT   | MT      |
| chr11 | 108128268 | <i>ATM</i>   | 14   | */-TC                       | MT     | MT   | MT      |
| chr11 | 108139265 | <i>ATM</i>   | 17   | */-T                        | WT     | WT   | MT      |
| chr11 | 108139266 | <i>ATM</i>   | 17   | */+TA                       | WT     | MT   | WT      |
| chr11 | 108158322 | <i>ATM</i>   | 26   | */+G                        | MT     | MT   | MT      |
| chr11 | 108163355 | <i>ATM</i>   | 29   | */-A                        | MT     | WT   | WT      |
| chr11 | 108163464 | <i>ATM</i>   | 29   | */-T                        | MT     | WT   | WT      |
| chr11 | 108165757 | <i>ATM</i>   | 31   | */-G                        | WT     | WT   | MT      |
| chr11 | 108170537 | <i>ATM</i>   | 33   | */-G                        | WT     | MT   | WT      |
| chr11 | 108175565 | <i>ATM</i>   | 36   | */+CT                       | WT     | WT   | MT      |
| chr11 | 108178702 | <i>ATM</i>   | 37   | */-A                        | MT     | MT   | WT      |
| chr11 | 108196064 | <i>ATM</i>   | 45   | -G/*                        | MT     | MT   | WT      |
| chr11 | 108196133 | <i>ATM</i>   | 45   | */+T                        | MT     | MT   | MT      |
| chr11 | 108206674 | <i>ATM</i>   | 55   | */+T                        | MT     | WT   | WT      |
| chr11 | 108236181 | <i>ATM</i>   | 62   | */+T                        | WT     | WT   | MT      |
| chr13 | 48941660  | <i>RB1</i>   | 10   | */-TTT                      | WT     | MT   | WT      |
| chr15 | 41799423  | <i>LTK</i>   | 11   | */-G                        | MT     | MT   | WT      |
| chr15 | 88472475  | <i>NTRK3</i> | 17   | */-C                        | MT     | MT   | MT      |
| chr15 | 88799388  | <i>NTRK3</i> | 1    | */-G                        | WT     | WT   | MT      |
| chr15 | 88799389  | <i>NTRK3</i> | 1    | */-A                        | MT     | WT   | WT      |
| chr17 | 29554593  | <i>NF1</i>   | 43   | */-C                        | MT     | MT   | WT      |
| chr17 | 29560079  | <i>NF1</i>   | 36   | */+T                        | WT     | MT   | WT      |
| chr17 | 29563003  | <i>NF1</i>   | 34   | */-TT                       | MT     | MT   | WT      |
| chr17 | 29585513  | <i>NF1</i>   | 31   | */-G                        | MT     | MT   | WT      |
| chr17 | 29622239  | <i>NF1</i>   | 26   | */+C                        | MT     | MT   | WT      |
| chr17 | 29622377  | <i>NF1</i>   | 26   | */-A                        | WT     | MT   | WT      |
| chr17 | 29622382  | <i>NF1</i>   | 26   | +C/*                        | MT     | WT   | WT      |
| chr17 | 29623142  | <i>NF1</i>   | 26   | */-ATCA                     | MT     | MT   | WT      |
| chr17 | 29631878  | <i>NF1</i>   | 25   | */+TT                       | MT     | WT   | WT      |
| chr17 | 29631879  | <i>NF1</i>   | 25   | */+T                        | WT     | MT   | WT      |
| chr17 | 29645851  | <i>NF1</i>   | 24   | */+A                        | MT     | MT   | WT      |
| chr17 | 29665124  | <i>NF1</i>   | 14   | */-C                        | MT     | MT   | MT      |
| chr17 | 29679409  | <i>NF1</i>   | 8    | */-G                        | WT     | MT   | MT      |
| chr17 | 29684100  | <i>NF1</i>   | 6    | */+CT                       | WT     | WT   | MT      |
| chr17 | 29687692  | <i>NF1</i>   | 2    | */+T                        | MT     | MT   | WT      |
| chr17 | 37868609  | <i>ERBB2</i> | 9    | */+T                        | MT     | WT   | WT      |
| chr17 | 37881973  | <i>ERBB2</i> | 23   | +CT/*                       | MT     | MT   | MT      |
| chr17 | 7572929   | <i>TP53</i>  | 10   | */+C                        | MT     | MT   | MT      |
| chr17 | 7577612   | <i>TP53</i>  | 6    | */+T                        | WT     | WT   | MT      |
| chr2  | 141072624 | <i>LRP1B</i> | 83   | */+G                        | MT     | MT   | MT      |
| chr2  | 141093397 | <i>LRP1B</i> | 78   | */+G                        | MT     | MT   | MT      |

| Chr   | Coord     | Gene           | Exon | INDEL (reference/variation) | H-1650 | H-23 | NA17022 |
|-------|-----------|----------------|------|-----------------------------|--------|------|---------|
| chr2  | 141202143 | <i>LRP1B</i>   | 64   | */-CA                       | MT     | MT   | WT      |
| chr2  | 141215130 | <i>LRP1B</i>   | 61   | */+A                        | WT     | MT   | WT      |
| chr2  | 141215131 | <i>LRP1B</i>   | 61   | */+GA                       | MT     | WT   | WT      |
| chr2  | 141232723 | <i>LRP1B</i>   | 60   | */-C                        | WT     | MT   | WT      |
| chr2  | 141267603 | <i>LRP1B</i>   | 52   | */-T                        | MT     | MT   | WT      |
| chr2  | 141274543 | <i>LRP1B</i>   | 50   | */-CT                       | MT     | MT   | WT      |
| chr2  | 141283549 | <i>LRP1B</i>   | 49   | */+C                        | MT     | MT   | WT      |
| chr2  | 141458010 | <i>LRP1B</i>   | 41   | */+TA                       | MT     | MT   | WT      |
| chr2  | 141607756 | <i>LRP1B</i>   | 29   | */-TC                       | MT     | WT   | WT      |
| chr2  | 141641560 | <i>LRP1B</i>   | 25   | */+G                        | MT     | MT   | MT      |
| chr2  | 141643874 | <i>LRP1B</i>   | 24a  | */+AAG                      | MT     | MT   | WT      |
| chr2  | 141665651 | <i>LRP1B</i>   | 22   | */-G                        | WT     | WT   | MT      |
| chr2  | 29416089  | <i>ALK</i>     | 29   | */+GA                       | MT     | MT   | WT      |
| chr2  | 29416092  | <i>ALK</i>     | 29   | */-G                        | WT     | WT   | MT      |
| chr2  | 29445251  | <i>ALK</i>     | 22   | */+C                        | MT     | MT   | MT      |
| chr2  | 29451773  | <i>ALK</i>     | 16   | */+A                        | MT     | MT   | MT      |
| chr2  | 42472794  | <i>EML4</i>    | 2a   | */+C                        | MT     | MT   | MT      |
| chr2  | 42530241  | <i>EML4</i>    | 15   | */+C                        | MT     | MT   | WT      |
| chr2  | 42544661  | <i>EML4</i>    | 19   | */-A                        | MT     | MT   | MT      |
| chr2  | 42552695  | <i>EML4</i>    | 20   | */-T                        | MT     | MT   | WT      |
| chr20 | 57415459  | <i>GNAS</i>    | 1    | */-G                        | MT     | WT   | MT      |
| chr3  | 178916824 | <i>PIK3CA</i>  | 1    | */-T                        | WT     | MT   | WT      |
| chr3  | 178936023 | <i>PIK3CA</i>  | 9    | */+TT                       | MT     | MT   | WT      |
| chr3  | 178942599 | <i>PIK3CA</i>  | 15   | */+G                        | WT     | WT   | MT      |
| chr3  | 178952131 | <i>PIK3CA</i>  | 20   | */-A                        | MT     | MT   | WT      |
| chr3  | 50251668  | <i>SLC38A3</i> | 1    | */+A                        | MT     | MT   | MT      |
| chr3  | 50251833  | <i>SLC38A3</i> | 2    | +G/+G                       | MT     | MT   | MT      |
| chr3  | 50253179  | <i>SLC38A3</i> | 6    | */+CG                       | MT     | WT   | WT      |
| chr3  | 50253258  | <i>SLC38A3</i> | 6    | */+C                        | WT     | WT   | MT      |
| chr3  | 50254882  | <i>SLC38A3</i> | 8    | */-GCA                      | MT     | MT   | WT      |
| chr3  | 50379949  | <i>ZMYND10</i> | 8    | */+C                        | MT     | MT   | WT      |
| chr3  | 50379983  | <i>ZMYND10</i> | 8    | */-G                        | WT     | MT   | WT      |
| chr3  | 50379990  | <i>ZMYND10</i> | 8    | */-T                        | MT     | WT   | WT      |
| chr3  | 50380780  | <i>ZMYND10</i> | 5    | */+C                        | MT     | MT   | WT      |
| chr3  | 89156894  | <i>EPHA3</i>   | 1    | */+C                        | MT     | MT   | MT      |
| chr3  | 89448573  | <i>EPHA3</i>   | 7    | */+C                        | MT     | MT   | WT      |
| chr3  | 89499328  | <i>EPHA3</i>   | 15   | */-A                        | MT     | WT   | WT      |
| chr4  | 55131170  | <i>PDGFRA</i>  | 4    | */+C                        | MT     | WT   | WT      |
| chr4  | 55136846  | <i>PDGFRA</i>  | 7    | */+TCT                      | MT     | MT   | WT      |
| chr4  | 55140709  | <i>PDGFRA</i>  | 10   | */-A                        | MT     | MT   | WT      |
| chr4  | 55140783  | <i>PDGFRA</i>  | 10   | */+TA                       | WT     | MT   | WT      |
| chr4  | 55140790  | <i>PDGFRA</i>  | 10   | */+CG                       | MT     | WT   | WT      |
| chr4  | 55143644  | <i>PDGFRA</i>  | 12   | */-T                        | WT     | WT   | MT      |
| chr4  | 55946196  | <i>KDR</i>     | 30   | */+G                        | MT     | MT   | WT      |
| chr4  | 55964396  | <i>KDR</i>     | 17   | */+T                        | WT     | WT   | MT      |
| chr4  | 55972890  | <i>KDR</i>     | 11   | */+T                        | MT     | WT   | WT      |
| chr4  | 66217192  | <i>EPHA5</i>   | 14   | */+T                        | MT     | MT   | MT      |
| chr4  | 66231779  | <i>EPHA5</i>   | 11   | */-A                        | WT     | WT   | MT      |
| chr5  | 112102891 | <i>APC</i>     | 3    | */+C                        | MT     | MT   | WT      |
| chr5  | 112151209 | <i>APC</i>     | 8    | */-GA                       | MT     | MT   | WT      |
| chr5  | 112151242 | <i>APC</i>     | 8    | */+A                        | WT     | WT   | MT      |
| chr5  | 112157686 | <i>APC</i>     | 10   | */+A                        | WT     | WT   | MT      |

| Chr  | Coord     | Gene   | Exon | INDEL (reference/variation) | H-1650 | H-23 | NA17022 |
|------|-----------|--------|------|-----------------------------|--------|------|---------|
| chr5 | 112170742 | APC    | 14   | */+AA                       | WT     | MT   | MT      |
| chr5 | 112173353 | APC    | 15   | */-C                        | MT     | MT   | WT      |
| chr5 | 112173572 | APC    | 15   | */+C                        | MT     | WT   | MT      |
| chr5 | 112174182 | APC    | 15   | */-A                        | WT     | WT   | MT      |
| chr5 | 112174528 | APC    | 15   | */-G                        | MT     | WT   | WT      |
| chr5 | 112176489 | APC    | 15   | */+A                        | MT     | MT   | WT      |
| chr5 | 112176791 | APC    | 15   | */-T                        | MT     | MT   | WT      |
| chr5 | 112176894 | APC    | 15   | */+CTC                      | MT     | MT   | WT      |
| chr5 | 112177023 | APC    | 15   | */-AG                       | WT     | MT   | WT      |
| chr5 | 112177176 | APC    | 15   | */-CT                       | MT     | MT   | WT      |
| chr5 | 112178256 | APC    | 15   | */-GT                       | MT     | MT   | WT      |
| chr5 | 176516692 | FGFR4  | 1    | */+G                        | MT     | MT   | MT      |
| chr5 | 176522359 | FGFR4  | 10   | */-CT                       | MT     | WT   | WT      |
| chr5 | 176524547 | FGFR4  | 16   | */-CT                       | WT     | MT   | WT      |
| chr7 | 41729278  | INHBA  | 2a   | */-T                        | MT     | WT   | MT      |
| chr7 | 55214433  | EGFR   | 4    | */+G                        | WT     | WT   | MT      |
| chr7 | 55232981  | EGFR   | 15   | */-A                        | MT     | MT   | WT      |
| chr7 | 55238176  | EGFR   | 17   | */+C                        | MT     | WT   | MT      |
| chr7 | 55242464  | EGFR   | 21   | */-GGAATTAAGAGAAGC          | MT     | WT   | WT      |
| chr7 | 55249077  | EGFR   | 22   | */+CA                       | MT     | MT   | WT      |
| chr7 | 55270258  | EGFR   | 29   | */-C                        | MT     | MT   | WT      |
| chr9 | 21994331  | CDKN2A | 1    | */-T                        | WT     | WT   | MT      |
| chr9 | 8341874   | PTPRD  | 26   | */-T                        | MT     | MT   | WT      |
| chr9 | 8341945   | PTPRD  | 26   | */-AC                       | MT     | WT   | WT      |
| chr9 | 8375940   | PTPRD  | 25   | */-G                        | MT     | WT   | WT      |
| chr9 | 8733838   | PTPRD  | 1    | */+A                        | WT     | WT   | MT      |
| chrX | 110439788 | PAK3   | 12   | */-T                        | MT     | WT   | WT      |

Chr, chromosome; WT, wild type; MT, mutant type; Coord, chromosome position.
